# Supplementary material for: Insight into the tectonostratigraphy of the historic Kefalonia island (Greece): a reflection seismic survey
Source: Copernicus journal article supplement (doi:10.5194/egusphere-2024-3783), 2024-12-10
Supplement: Supplementary file [file egusphere-2024-3783-AC1-supplement.pdf]

Dear reviewer 1,

Thank you for your valuable comments that helped us improving the quality of this paper. Most of the suggested comments have been implemented and when not possible, a detailed explanation is given.

Figures have been improved as suggested to help the readers to better locate the investigations conducted and to reach a broader audience.

Replies to individual comments:

Title R: Thanks for the suggestions, we changed the title to be less ambiguous, more concise and more focused on the geophysical aspect as follow “Reflection seismic imaging across the Thinia valley (Greece)”

- L24R: Unfortunately, we do not have any information about the age. As you say, the dating in literature of the possible landslides is highly questionable and reflection seismology do not add any information regarding ages.
- L39R: We refer to (Gaki-papanastassiou et al., 2010). In this phrase, a list of references of past geological and geophysical works done in the island highlight their variety. This reference is reported as an example of geomorphological study in Kefalonia island.
- L40R: Thanks for the suggested references. We added Stiros et al. (1994) reference. We could not find the suggested Sorel studies but we can see that they are included in later works that are already referenced in our paper, such as Hunter (2013), Karymbalis et al. (2013) and Gaki-Papanastassiou et al. (2010 and 2011)
- L41R: The text has been updated as follow to add more details: “Analyses of the island’s displacements from the observed seismicity have shown complex horizontal motion that suggests two separate crustal blocks in the island, the main island with a displacement towards south-west and Paliki peninsula with a displacement towards north (Ganas et al., 2015). In addition, an unclear history of rotational movements characterized the island with probably both clockwise and anticlockwise rotational phases (Duermeijer et al., 2000; Sbaa et al., 2017).”.
- L55-57R: Thanks for the suggestion, we modified the text to clarify how this study contributes beyond previous studies in the same area, including Hunter (2013), and we better defined the key question as you suggested. We included a text comparison also in the discussion section to highlight what the presented results add to Hunter work and in what they agree or differ.
- L60R: The text has been updated and the relation between this study and previous studies is better indicated. Previous geophysical methods applied along the Thinia valley are now summarized in the introduction.
- L64R: Thanks for the comment, other names for this structure found in literature are added to the paper to increase the audience understanding.
- L66R: You are right. Thanks for pointing it out. Text updated accordingly.

- L70R (Figure 1): Figure 2 was reporting the topography of the area but we agree that was not complete. Now it has been updated with a map view of the same area complete of all needed information.
- L74R: Thanks for the clarification. Text updated.
- L83R: You are right. The figure was modified but the text was not updated. Now the text is updated according to the figures. Thanks for spotting it.
- L89R: Thank for the clarification. The text has been updated to include this information as follow: “shows eastwards ancient dipping normal faults on the west of the valley which underwent tectonic inversion”.
- L97R (Figure 1): elevation information added in the updated figure 2. The profiles in the red inset have been replaced with an asterisk for the whole survey while their precise locations are now reported in figure 2 with a larger scale.
- L100R: Text has been updated in this chapter and in the introduction to include this work relation with previous studies.
- L114R (Figure 2): Figure updated as suggested from the reviewer to include all missing information and be of easier readability for the audience.
- L167R: Different velocities and parameters are always tested to ensure the best results from each processing step and in this case, this was the model resulting in the best results. In general, NMO velocities are usually different from real velocities and valid only for the NMO correction. Therefore, even if they can be used as starting reference for other velocities models (e.g. the one used for time to depth conversion) they will most likely be different. Text has been updated to include more details on the time to depth model selection.
- Figures 3 and 4R: Extra arrows are added in figures 3 and 4 to help better identify the reflections.
- L187-188R: See reply L167R.
- L280R (Figure 8): Thanks for the comment, the geological map shown in Figure 8b has similar scale as the one suggested from Hunter (2013) and shows mostly the same features, but considers also other works as the IGME 1985 geological map. The small local features shown in Hunter’s map and not reported in Figure 8b are below our acquisition resolution. We agree that the map can be shown larger so we added a zoom in inset in Figure 8b showing the interpreted area to better visualize the details.  
This paper is not meant to be a review of previous works, we would not like to do a direct comparison with previous geological cross-sections since many studies (i.e., Underhill, 1989; IGME, 1985, 1996; Gaki-Papanastassiou et al. 2011) were done in the area often with different results and all of them reliable only for shallower depth than this paper. In the discussion section a paragraph is added to compare the obtained results with Hunter (2013) results and highlighting corresponding features of the geology in the area (thrusts and stratigraphy) but also the limit of comparing these different works.  
We are not able to define the exact location of the probable landslide material since landslides are very localized and below our resolution and seismic velocities are an average of all materials they cross. We suggest that landslide material is probably

present in the low velocity chaotic near surface layer (transparent grey in Figure 8a) since its average seismic characteristics (velocity and reflectivity) are similar to the ones typical of landslides material and different from the ones expected from only quaternary sediments. Text has been updated in the interpretation and conclusion sections to make it clearer.

- L318R: Thanks for the clarification, the text has been updated to remove the connection with a covered channel as follow: “and overburden landslide materials are detected.”.
